# Supplementary material
Source: publisher figshare collection journal article supplement (https://wellcome.figshare.com/ndownloader/files/22694159)
Supplement: Supplementary file 1 [file 22694159]

## Sheet: Sheet1
	issn_publication-format_print	issn_publication-format_electronic	issn-l	journal-id_doi	clustered_titles	discipline-area	owner_ROR-ID	publisher_ROR-ID	apc-list-price_range-low	apc-list-price_range-high	apc-list-price_currency	apc-waiver-discount_policy	subscription-list-price_range-low	subscription-list-price_range-high	subscription-list-price_currency	subscription-list-price_member-of-the-Association-of-American-Universities	subscription-discount-policy	date-information-submitted	reporting-period-start	reporting-period-end	price-transparency_context	research-articles-published	acceptance-rate	desk-rejection-rate	issue-publication-frequency	median-number-reviews	median-time-submission-to-first-decision	median-time-peer-review	median-time-acceptance-to-publication	counter5_unique-item-requests	counter5_total-item-requests	price-breakdown_journal-community-development	price-breakdown_submission-first-decision	price-breakdown_peer-review	price-breakdown_services-acceptance-publication	price-breakdown_services-post-publication	price-breakdown_platform-development-support	price-breakdown_sales-marketing	price-breakdown_author-customer-support
Required?	Only one of issn_publication-format_print, issn_publication-format_electronic, issn-l, journal-id_doi is required	Only one of issn_publication-format_print, issn_publication-format_electronic, issn-l, journal-id_doi is required	Only one of issn_publication-format_print, issn_publication-format_electronic, issn-l, journal-id_doi is required	Only one of issn_publication-format_print, issn_publication-format_electronic, issn-l, journal-id_doi is required	No	Yes	No	Yes	Yes	Yes	Yes	Yes	Yes	Yes	Yes	Yes	Yes	Yes	Yes	Yes	No	Yes	Yes	Yes	Yes	Yes	Yes	Yes	Yes	Yes	Yes	Yes	Yes	Yes	Yes	Yes	Yes	Yes	Yes
Validation	Valid ISSN	Valid ISSN	Valid ISSN	Valid DOI			Valid ROR ID	Valid ROR ID	Number with up to two decimal places. A period (dot) should be used as the decimal separator. No thousand separator should be used	Number with up to two decimal places. A period (dot) should be used as the decimal separator. No thousand separator should be used	Valid ISO 4217:2015 alphabetic currency code	Valid URL including protocol or 'none'	Number with up to two decimal places. A period (dot) should be used as the decimal separator. No thousand separator should be used	Number with up to two decimal places. A period (dot) should be used as the decimal separator. No thousand separator should be used	Valid ISO 4217:2015 alphabetic currency code	Valid ISO 4217:2015 alphabetic currency code	Valid URL including protocol or 'none'.	ISO8601 formatted date	ISO8601 formatted date	ISO8601 formatted date	Valid URL including protocol	Integer	Percentage	Percentage	One of: Annual;Bimonthly;Semiweekly;Daily;Biweekly;Semiannual;Biennial;Triennial;Three times a week;Three times a month;Monthly;Quarterly;Semimonthly;Three times a year;Weekly;Continuously updated;Other	Integer	Number with up to two decimal places. A period (dot) should be used as the decimal separator. No thousand separator should be used.	Number with up to two decimal places. A period (dot) should be used as the decimal separator. No thousand separator should be used.	Number with up to two decimal places. A period (dot) should be used as the decimal separator. No thousand separator should be used.	Integer	Integer	Number with up to two decimal places. A period (dot) should be used as the decimal separator. Must be less than or equal to 100. Total of "price-breakdown_" columns should be 100	Number with up to two decimal places. A period (dot) should be used as the decimal separator. Must be less than or equal to 100. Total of "price-breakdown_" columns should be 100	Number with up to two decimal places. A period (dot) should be used as the decimal separator. Must be less than or equal to 100. Total of "price-breakdown_" columns should be 100	Number with up to two decimal places. A period (dot) should be used as the decimal separator. Must be less than or equal to 100. Total of "price-breakdown_" columns should be 100	Number with up to two decimal places. A period (dot) should be used as the decimal separator. Must be less than or equal to 100. Total of "price-breakdown_" columns should be 100	Number with up to two decimal places. A period (dot) should be used as the decimal separator. Must be less than or equal to 100. Total of "price-breakdown_" columns should be 100	Number with up to two decimal places. A period (dot) should be used as the decimal separator. Must be less than or equal to 100. Total of "price-breakdown_" columns should be 100	Number with up to two decimal places. A period (dot) should be used as the decimal separator. Must be less than or equal to 100. Total of "price-breakdown_" columns should be 100
Notes	Please supply at least one of issn_publication-format_print, issn_publication-format_electronic, issn-l, journal-id_doi	Please supply at least one of issn_publication-format_print, issn_publication-format_electronic, issn-l, journal-id_doi	Please supply at least one of issn_publication-format_print, issn_publication-format_electronic, issn-l, journal-id_doi	Please supply at least one of issn_publication-format_print, issn_publication-format_electronic, issn-l, journal-id_doi	Please enter the row number for the first title in a cluster, then a -, and then the row number for the final titles in a cluster	Numeric value from https://read.oecd-ilibrary.org/science-and-technology/frascati-manual-2015_9789264239012-en#page60 or one of the following: all disciplines, all STEM disciplines, all HSS disciplines	Where the publication is owned by an organisation other than the publisher (e.g. a Learned Society) then the owner's ROR ID should be supplied - see https://ror.org/facts/ for further information	ROR ID of the organisation which is responsible for publishing the title. See https://ror.org/facts/ for further information	The lower price of any APC list price range for primary research articles. If there is just a single APC list price enter the same number in both apc-list-price_range-low and apc-list-price_range-high	The higher price of any APC list price range for primary research articles. If there is just a single APC list price enter the same number in both apc-list-price_range-low and apc-list-price_range-high	Active currency codes can be found at https://en.wikipedia.org/wiki/ISO_4217#Active_codes	A link to the publisher's publicly available policy for APC waivers and discounts, or an indication there is none.	The lower price of any subscription list price range for primary research articles. If there is just a single subscription list price enter the same number in both subscription-list-price_range-low and subscription-list-price_range-high	The higher price of any subscription list price range for primary research articles. If there is just a single subscription list price enter the same number in both subscription-list-price_range-low and subscription-list-price_range-high	Active currency codes can be found at https://en.wikipedia.org/wiki/ISO_4217#Active_codes	To facilitate comparison of prices between publishers	A link to the publisher's publicly available policy for discounting subscription prices, or an indication there is none.	Use format yyyy-mm-dd	Use format yyyy-mm-dd. Ideally the reporting period should be for the last calendar year, but it is recognised that this maynot always be possible (e.g. for a title that is less than 1 year old)	Use format yyyy-mm-dd. Ideally the reporting period should be for the last calendar year, but it is recognised that this maynot always be possible (e.g. for a title that is less than 1 year old)	An opportunity for publishers to provide additional context for customers wish to know how they have compiled data for the framework, or providing additional insight into how to interpret the figures	Number of research articles published in reporting period specified by reporting-period-start and report-period-end. Exclude author corrections, corrigendum, errata, editorials, and reviews.	Acceptance rate for reporting period specified by reporting-period-start and report-period-end	Desk rejection rate for reporting period specified by reporting-period-start and report-period-end	Choose one from: Annual (=one per year) Bimonthly (=one every two months) Semiweekly (=two per week) Daily (=one per day) Biweekly (=one ever two weeks) Semiannual (=two per year) Biennial (=one every two years) Triennial (=one every three years) Three times a week Three times a month Monthly Quarterly Semimonthly (=two per month) Three times a year Weekly Continuously updated Other	Median number of reviews for research articles in reporting period specified by reporting-period-start and report-period-end. If an article goes back to the same reviewer for a second review then this counts as two reviews.	Median time in days from submission to first decision in reporting period specified by reporting-period-start and report-period-end. Decision means whether to reject or send for peer review. Include papers decided on the basis of assessment by in-house prepublication teams, editorial boards, editorial boards and external referees, or subeditors	Median time in days that the submitted article is under review using the NISO definition of article versions (https://www.niso.org/publications/niso-rp-8-2008-jav) in reporting period specified by reporting-period-start and report-period-end.	Median time in days from the time a manuscript is accepted to the time the version of record is available using the NISO definition of article versions (https://www.niso.org/publications/niso-rp-8-2008-jav) in reporting period specified by reporting-period-start and report-period-end.	The data should be aggregated across customers to provide global usage figures.	The data should be aggregated across customers to provide global usage figures.	i.e. identifying need for the journal, aims and scope development, investment in funding for field, editorial board costs, commissioning content, competitor analysis, benchmarking, policy development, portfolio development	i.e. triaging [NB this line is separated from the next in order to accommodate the Open Platform publishing model]	Please do not factor in time or resources donated by editors or reviewers; please include specialist reviews; e.g. recruiting and training peer reviewers and the editors who work with them, peer review management and tracking systems. If the journal operates post-publication peer review please enter 0%.	i.e. copyediting, formatting, typesetting, proofreading, assigning and depositing DOIs, XML file conversion (if content is not born XML), tagging, quality assurance checks, integration with a&I databases/aggregators/repositories/APC management systems, figure re-lettering or other improvements, dealing with article enhancements such as video abstracts, proofing process and author engagement aroun…	i.e. handling ethical queries, provision of usage statistics, longterm preservation and access, reader services, postage, inventory and stock control	i.e. platform, platform vendor management, hosting, systems development, systems support. One off development costs should be amortized over 3 years, and figures in reporting period specified by reporting-period-start and report-period-end included.	i.e. sales teams, sales administration,legal costs for contracts, integration with and promotion on social media networks, sponsorship	i.e. helpdesk, usage/impact/other reports, training, author queries about copyright or CC licenses
JATS mapping	/journal-meta/issn[@publication-format="print"]	/journal-meta/issn[@publication-format="electronic"]	/journal-meta/issn-l	/journal-meta/journal-id[@journal-id-type="doi"]
KBART mapping
